# Supplementary material
Source: PubMed Central journal article supplement (PMC6320309)
Supplement: NIHMS1502082-supplement-13361_2018_2027_MOESM1_ESM.pdf [file NIHMS1502082-supplement-13361_2018_2027_MOESM1_ESM.pdf]

## SUPPLEMENTAL MATERIALS

### **Native Top-Down Mass Spectrometry and Ion Mobility Spectrometry of the Interaction of Tau Protein with a Molecular Tweezer Assembly Modulator**

Michael Nshanian<sup>1</sup>, Carter Lantz<sup>1</sup>, Piriya Wongkongkathep<sup>1#</sup>, Thomas Schrader<sup>2</sup>, Frank-Gerrit Klärner<sup>2</sup>, Anika Blümke<sup>3</sup>, Clément Despres<sup>4</sup>, Michael Ehrmann<sup>3</sup>, Caroline Smet-Nocca<sup>4</sup>, Gal Bitan<sup>5,6</sup>, and Joseph A. Loo<sup>1,6,7</sup>

<sup>1</sup>Department of Chemistry and Biochemistry, University of California-Los Angeles, Los Angeles, CA 90095

<sup>2</sup>Institute of Chemistry, University of Duisburg-Essen, Essen, Germany

<sup>3</sup>Center of Medical Biotechnology, Faculty of Biology, University Duisburg-Essen, Universitaetsstrasse, Essen, Germany

<sup>4</sup>Université Lille, CNRS, UMR 8576 - UGSF - Unité de Glycobiologie Structurale et Fonctionnelle, F-59000 Lille, France

<sup>5</sup>Department of Neurology and Brain Research Institute, David Geffen School of Medicine, University of California-Los Angeles, Los Angeles, CA 90095

<sup>6</sup>Molecular Biology Institute, University of California-Los Angeles, Los Angeles, CA 90095

<sup>7</sup>Department of Biological Chemistry, University of California-Los Angeles, Los Angeles, CA 90095

<sup>#</sup>*Current address:* Faculty of Medicine, Chulalongkorn University, Bangkok, Thailand

*Journal of the American Society for Mass Spectrometry*

\*Correspondence to: Joseph A. Loo; e-mail: JLoo@chem.ucla.edu

**Tau expression and purification.** The 2N4R tau isoform (residues 1-441 of human MAPT) and the fragment tau(192–324) were produced in the *E. coli* BL21(DE3) strain carrying a pET15b recombinant plasmid (Novagen). The corresponding genes were inserted into NcoI/XhoI cloning sites. The induction phase was performed by addition of 0.5 mM isopropyl  $\beta$ -D-1-thiogalactopyranoside for 3 h at 37 °C. Cells were harvested by centrifugation at  $5,000 \times g$  for 30 min and the pellet was resuspended in 50 mM  $\text{NaH}_2\text{PO}_4/\text{Na}_2\text{HPO}_4$ , pH 6.2, 2.5 mM EDTA, 2 mM DTT and 0.5% Triton X-100 supplemented with a Complete<sup>TM</sup> protease-inhibitor cocktail (Roche). The lysate was obtained by homogenizing this suspension using a high-pressure homogenizer followed by centrifugation at  $30,000 \times g$  for 30 min. The extract was incubated at 75 °C for 15 min to precipitate most of the bacterial proteins from the soluble extract as a first purification step. The soluble proteins were separated from the precipitate by centrifugation at  $4,000 \times g$  for 20 min and the desired protein was purified by cation-exchange chromatography (HiTrap SP HP 1 ml, GE Healthcare). Elution fractions were analyzed by SDS-PAGE and fractions containing the pure protein were pooled together for buffer-exchange in 50 mM ammonium bicarbonate (HiPrep 26/10 desalting, GE Healthcare) prior to lyophilization. Lyophilized proteins were stored at -20 °C until further use.

***In-vitro* phosphorylation.** Recombinant ERK2 and MEK3-R4F kinases were produced as described previously [1]. Tau(192–324) was dissolved at 100  $\mu\text{M}$  with 1  $\mu\text{M}$  of ERK2 and  $\sim 0.1 \mu\text{M}$  of MEK3 in 400  $\mu\text{l}$  of buffer containing 50 mM HEPES-KOH, pH 8.0, 12.5 mM  $\text{MgCl}_2$ , 50 mM NaCl, 2 mM EDTA, 1 mM DTT, 1 mM EGTA, and 12.5 mM ATP. The mixture was incubated at 37 °C overnight. Enzymatic reaction was stopped by incubating the reaction mixture at 75 °C for 15 min followed by centrifugation at  $16,000 \times g$  for 20 min. Then, the supernate was buffer-exchanged in 50 mM ammonium bicarbonate and lyophilized. Prior to further analyses, phosphorylation was qualitatively checked by a shift in the apparent mobility of the protein band on SDS-PAGE.

1. Qi, H., Despres, C., Prabakaran, S., Cantrelle, F. X., Chambraud, B., Gunawardena, J., Lippens, G., Smet-Nocca, C., Landrieu, I.: The Study of Posttranslational Modifications of Tau Protein by Nuclear Magnetic Resonance Spectroscopy: Phosphorylation of Tau Protein by ERK2 Recombinant Kinase and Rat Brain Extract, and Acetylation by Recombinant Creb-Binding Protein. *Methods Mol. Biol.* **1523**, 179-213 (2017)

## Tau isoforms analyzed and their amino acid sequences

### **4-Repeat-tau (2N4R): (441 aa) 45,900 Da**

MAEPRQEFEV MEDHAGTYGL GDRKDQGGYT MHQDQEGDTD AGLKESPLQT PTEDGSEEPG SETSDAKSTP TAEDVTAPLV  
 DEGAPGKQAA AQPHTIPEG TTAEAEAGIGD TPSLEDEAAG HVTQARMVSK SKDGTGSDDK KAKGADGKTK IATPRGAAPP  
 GQKGQANATR IPAKTPPAPK TPPSSGEPPK SGDRSGYSSP GSPGTPGSR S RTPSLPTPPT REPKKVAVVR TPPKSPSSAK  
 SRLQTAPVPM PDLKNVSKSI GSTENLKHQP GGGKVQIINK KLDLSNVQSK CGSKDNIKHV PGGGSVQIVY KPVDSLKVTS  
 KCGSLGNIHH KPGGGQVEVK SEKLDKDRV QSKIGSLDNI THVPGGNGK IETHKLTFR NAKAKTDHGA EIVYKSPVVS  
 GDTSPRHLSN VSSTGSIDMV DSPQLATLAD EVSASLAKQ L

### **3-Repeat-tau (0N3R)/PHP-Tau (0N3R): (352 aa) 36,800 Da**

MAEPRQEFEV MEDHAGTYGL GDRKDQGGYT MHQDQEGDTD AGLKAE EAGI GDTPSLEDEA AGHV TQARMV SKSKDGTGSD  
 DKKAKGADGK TKIATPRGAA PPGQKQANA TRIPAKTPPA PKTPPSSGEP PKSGDRSGYS SPGSPGTPGS RSRTPSLPTP  
 PTREPKKVAV VRTPPKSPSS AKSRLQTAPV PMPDLKNVKS KIGSTENLKH QPGGGKVQIV YKPVDLSKVT SKCGSLGNIH  
 HKPGGGQVEV KSEKLDKDR VQSKIGSLDN ITHVPGGNGK KIETHKLTFR ENAKAKTDHG AEIVYKSPVVS SGTSPRHLS  
 NVSSTGSIDM VDSPQLATLA DEVSASLAKQ GL

### **4-Repeat tau fragment F3: (257-360) 10,880 Da**

ASKIGSTENL KHQGGGKVQ IINKLDLSNV QSKCGSKDNI KHVPGGGSVQ IVYKPVDSLK VTSKCGSLGN IHHKPGGGQV  
 EVKSEKLDK DRVQSKIGSL DNI

### **tau fragment F8 with C291A mutation: (192-324) 13,800 Da**

GDRSGYSSPG SPGTPGSR SR TP SLPTP PTR EPKKVAVVRT PPKSPSSAKS RLQTAPVPMP DLKNVSKIG STENLKHQPG  
 GGKVQIINK LDLSNVQSKA GSKDNIKHVP GGGSVQIVYK PVDLSKVTSK CGS

|                     |         |      |                                                          |
|---------------------|---------|------|----------------------------------------------------------|
| phospho-tau-F8 frag | 192-324 | ERK2 | Phosphorylation sites S199, S202, T205, T217, T231, S235 |
|---------------------|---------|------|----------------------------------------------------------|

**Figure S1.** Sequences of tau proteins measured for this study.

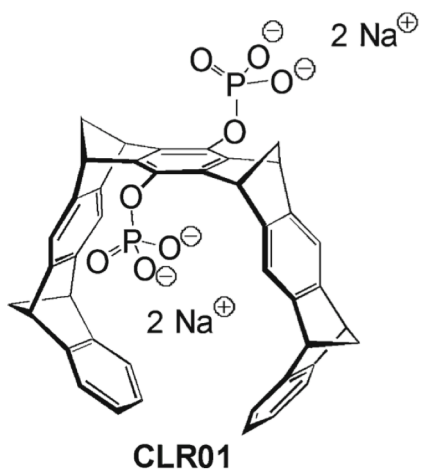

**Figure S2.** Structure of CLR01 tweezer compound.

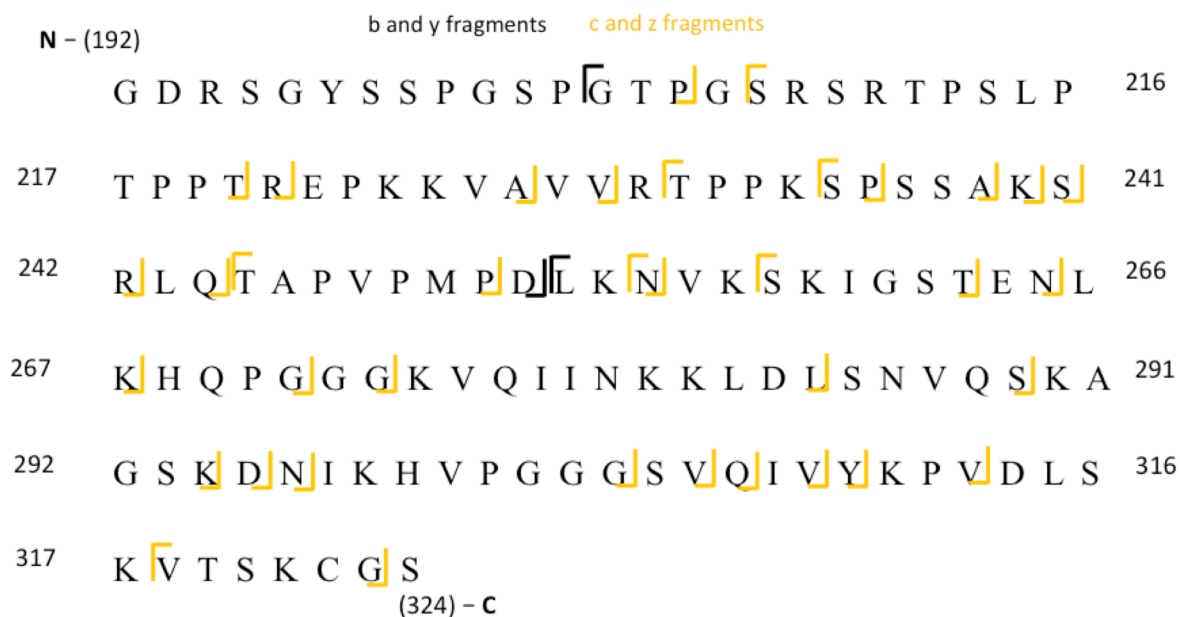

**Figure S3.** ECD-MS fragmentation of 17+ charge state of 4R-repeat domain C291A tau fragment.

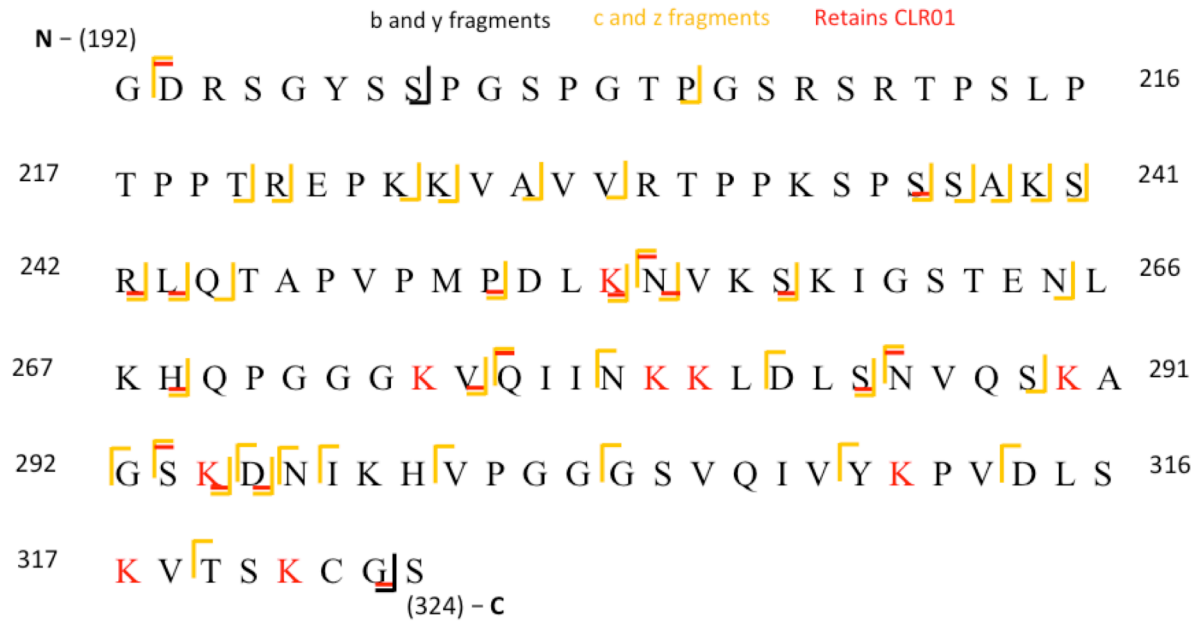

**Figure S4.** ECD-MS fragmentation of 17+ charge state of 4R-repeat domain C291A tau fragment bound to CLR01 (1:1 complex). Red lines indicate CLR01-bound fragment ions.

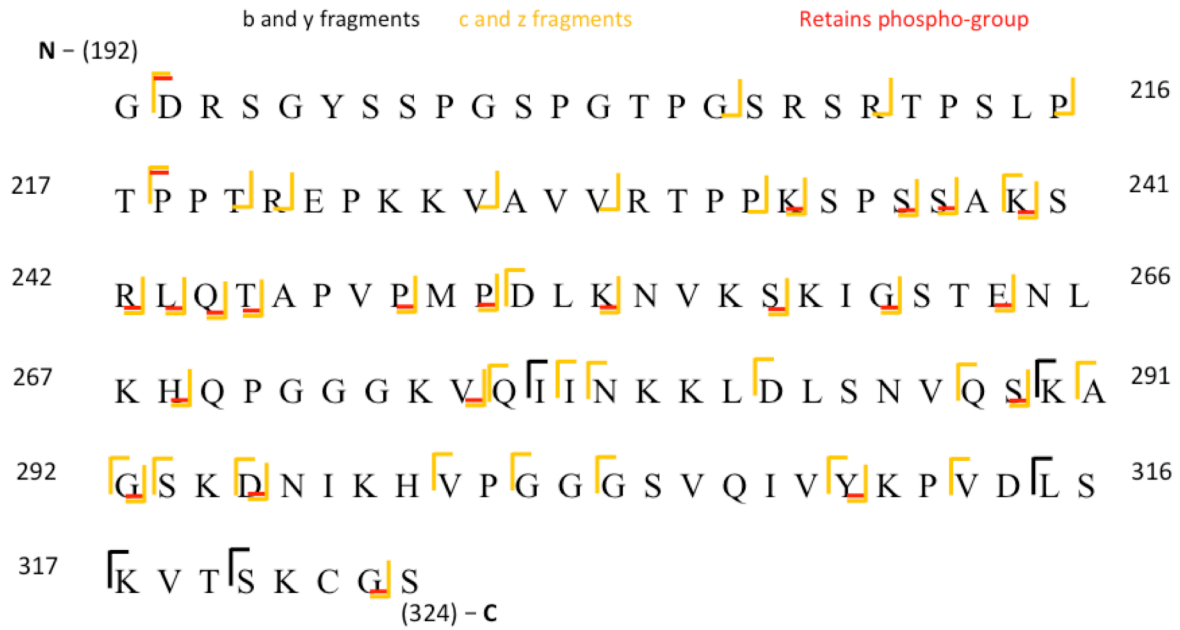

**Figure S5.** ECD-MS of 4R-repeat domain phosphorylated 4R-tau fragment C291A. (Red lines indicate phosphorylated fragment ions).

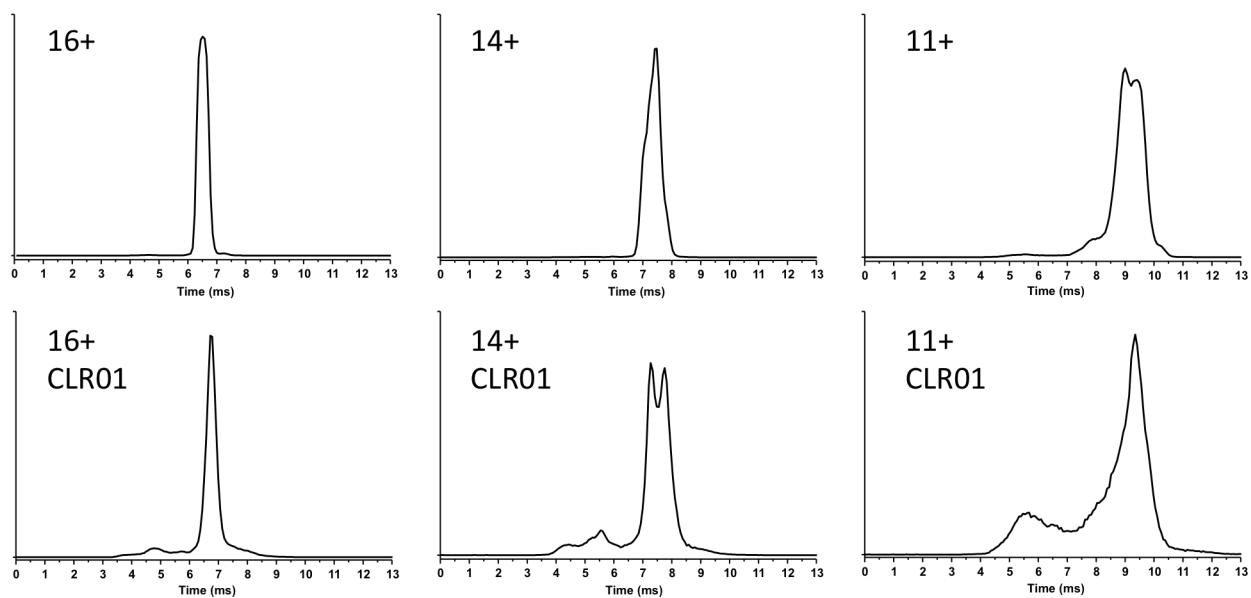

**Figure S6.** IM-MS of 16+, 14+, and 11+ charge state of 4R-tau C291A fragment with and without CLR01 bound (1:1 complex).
